# Supplementary material for: Point-scale multi-objective calibration of the Community Land Model (version 5.0) using in situ observations of water and energy fluxes and variables
Source: Copernicus journal article supplement (doi:10.5194/hess-27-2827-2023), 2023-07-31
Supplement: Supplementary file 1 [file hess-27-2827-2023-supplement.pdf]

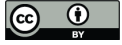

*Supplement of*

**Point-scale multi-objective calibration of the Community Land Model (version 5.0) using in situ observations of water and energy fluxes and variables**

**Tanja Denager et al.**

*Correspondence to:* Tanja Denager (tad@geus.dk)

The copyright of individual parts of the supplement might differ from the article licence.

Table S1: Look-up table, initial and optimized LAI for all scenarios.

| Scenario        |   | X                                           | Z                                           | A   | B        | C          | D             | E   | F       | G         | H            | I           | J                   | K   | L        | M                |
|-----------------|---|---------------------------------------------|---------------------------------------------|-----|----------|------------|---------------|-----|---------|-----------|--------------|-------------|---------------------|-----|----------|------------------|
| Target variable |   | Control run (look-up table parameter value) | Initial model run (initial parameter value) | LE  | LE and q | LE and SWC | LE, q and SWC | H   | H and q | H and SWC | H, q and SWC | H and Tsoil | H, q, SWC and Tsoil | q   | LE and H | LE, H, q and SWC |
| Leaf Area Index |   |                                             |                                             |     |          |            |               |     |         |           |              |             |                     |     |          |                  |
| Jan             | - | 0.53                                        | 0.5                                         | 0.7 | 0.9      | 0.5        | 1.1           | 0.5 | 0.5     | 0.5       | 0.6          | 0.4         | 0.5                 | 0.6 | 0.5      | 0.6              |
| Feb             | - | 0.3                                         | 0.5                                         | 0.5 | 0.4      | 0.7        | 0.3           | 0.5 | 0.4     | 0.5       | 0.6          | 0.5         | 0.5                 | 0.5 | 0.5      | 0.5              |
| Mar             | - | 0.21                                        | 1                                           | 1.3 | 1.6      | 1.2        | 1.6           | 1.1 | 1.0     | 1.0       | 1.1          | 1.2         | 1.0                 | 0.9 | 1.2      | 1.1              |
| Apr             | - | 0.5                                         | 2.8                                         | 1.6 | 1.7      | 2.8        | 2.1           | 2.7 | 2.7     | 2.8       | 2.4          | 4.4         | 5.3                 | 2.2 | 2.6      | 2.3              |
| May             | - | 1.51                                        | 3.5                                         | 2.6 | 2.4      | 2.8        | 2.1           | 3.3 | 2.8     | 3.5       | 3.1          | 7.1         | 6.7                 | 3.3 | 2.9      | 3.4              |
| Jun             | - | 2.65                                        | 4.5                                         | 5.0 | 4.7      | 4.6        | 4.9           | 4.1 | 4.2     | 4.8       | 5.4          | 5.0         | 5.6                 | 4.7 | 4.3      | 4.6              |
| Jul             | - | 1.97                                        | 4                                           | 1.1 | 1.2      | 2.7        | 1.7           | 3.2 | 1.7     | 3.7       | 3.2          | 7.8         | 9.5                 | 4.2 | 2.4      | 2.5              |
| Aug             | - | 1.27                                        | 0.5                                         | 0.8 | 0.6      | 0.7        | 1.1           | 0.5 | 0.4     | 0.5       | 0.6          | 0.8         | 0.7                 | 0.5 | 0.6      | 0.6              |
| Sep             | - | 0.98                                        | 1                                           | 2.2 | 2.2      | 1.3        | 2.2           | 1.1 | 1.4     | 1.1       | 1.1          | 2.2         | 3.4                 | 1.0 | 1.3      | 1.6              |
| Oct             | - | 0.85                                        | 1                                           | 1.5 | 0.8      | 1.2        | 2.0           | 1.0 | 1.1     | 1.1       | 1.0          | 1.3         | 1.3                 | 0.9 | 1.0      | 1.2              |
| Nov             | - | 0.93                                        | 1                                           | 1.0 | 1.7      | 1.0        | 0.7           | 1.2 | 1.5     | 1.0       | 1.1          | 1.2         | 1.6                 | 1.0 | 1.0      | 1.3              |
| Dec             | - | 0.65                                        | 1                                           | 1.3 | 1.1      | 1.0        | 1.2           | 1.0 | 1.4     | 1.0       | 0.9          | 1.1         | 1.1                 | 1.0 | 1.0      | 0.9              |

Table S2: Look-up table, initial and optimized optical parameters for all scenarios.

| Scenario                       |  |                     | X                                           | Z                                           | A    | B        | C          | D             | E    | F       | G         | H            | I           | J                   | K    | L        | M                |
|--------------------------------|--|---------------------|---------------------------------------------|---------------------------------------------|------|----------|------------|---------------|------|---------|-----------|--------------|-------------|---------------------|------|----------|------------------|
| Target variable                |  |                     | Control run (look-up table parameter value) | Initial model run (initial parameter value) | LE   | LE and q | LE and SWC | LE, q and SWC | H    | H and q | H and SWC | H, q and SWC | H and Tsoil | H, q, SWC and Tsoil | q    | LE and H | LE, H, q and SWC |
| leaf reflectance - shortwave   |  | rho <sub>lvis</sub> | 0.11                                        | 0.11                                        | 0.03 | 0.03     | 0.09       | 0.03          | 0.1  | 0.08    | 0.11      | 0.09         | 0.08        | 0.09                | 0.09 | 0.08     | 0.09             |
| leaf reflectance – longwave    |  | rho <sub>lnir</sub> | 0.35                                        | 0.35                                        | 0.32 | 0.34     | 0.32       | 0.39          | 0.37 | 0.45    | 0.37      | 0.37         | 0.42        | 0.34                | 0.39 | 0.37     | 0.39             |
| stem reflectance - shortwave   |  | rho <sub>svis</sub> | 0.31                                        | 0.31                                        | 0.22 | 0.17     | 0.22       | 0.31          | 0.23 | 0.22    | 0.29      | 0.26         | 0.26        | 0.23                | 0.27 | 0.32     | 0.3              |
| stem reflectance – longwave    |  | rho <sub>snir</sub> | 0.53                                        | 0.53                                        | 0.51 | 0.38     | 0.41       | 0.36          | 0.37 | 0.3     | 0.45      | 0.38         | 0.31        | 0.30                | 0.4  | 0.42     | 0.39             |
| leaf transmittance - shortwave |  | tau <sub>lvis</sub> | 0.05                                        | 0.05                                        | 0.04 | 0.02     | 0.05       | 0.02          | 0.05 | 0.04    | 0.05      | 0.05         | 0.04        | 0.05                | 0.05 | 0.05     | 0.05             |
| leaf transmittance – longwave  |  | tau <sub>lnir</sub> | 0.34                                        | 0.34                                        | 0.47 | 0.45     | 0.45       | 0.39          | 0.38 | 0.31    | 0.38      | 0.4          | 0.34        | 0.41                | 0.38 | 0.4      | 0.38             |
| stem transmittance - shortwave |  | tau <sub>svis</sub> | 0.12                                        | 0.12                                        | 0.1  | 0.1      | 0.11       | 0.09          | 0.12 | 0.1     | 0.12      | 0.12         | 0.12        | 0.11                | 0.11 | 0.12     | 0.13             |
| stem transmittance – longwave  |  | tau <sub>snir</sub> | 0.25                                        | 0.25                                        | 0.2  | 0.35     | 0.21       | 0.31          | 0.24 | 0.26    | 0.25      | 0.2          | 0.17        | 0.17                | 0.22 | 0.18     | 0.26             |

Table S3: .pst file for PEST, Scenario D

---

```

pcf
* control data
restart regularisation
47    315864    1        30    36
2     7        double point  1    0    0
10    -3.0     0.3       0.05  8
3     3     0.01
0.1
0     0.005  4     3     0.01  3
1     1     1
* singular value decomposition
2
30    5E    7
0
* parameter groups
Params      relative    0.01    0.0001    switch    2.0    parabolic
* parameter data
sand1_____ log    factor  87.71872    0.1    150    params    1.00.0 1
sand2_____ log    factor  56.89878    0.1    150    params    1.0 0.0 1
clay1_____ log    factor  13.65003    0.1    100    params    1.0 0.0 1
clay2_____ log    factor  14.30049    0.1    100    params    1.0 0.0 1
lai_jan_____ log    factor  1.103101    0.001  50    params    1.0 0.0 1
lai_feb_____ log    factor  0.3145748    0.001  50    params    1.0 0.0 1
lai_mar_____ log    factor  1.580888    0.001  50    params    1.0 0.0 1
lai_apr_____ log    factor  2.065890    0.001  50    params    1.0 0.0 1
lai_may_____ log    factor  2.114882    0.001  50    params    1.0 0.0 1
lai_jun_____ log    factor  4.899428    0.001  50    params    1.0 0.0 1
lai_jul_____ log    factor  1.647559    0.001  50    params    1.0 0.0 1
lai_aug_____ log    factor  1.065331    0.001  50    params    1.0 0.0 1
lai_sep_____ log    factor  2.240715    0.001  50    params    1.0 0.0 1

```

|               |       |        |               |       |     |        |            |
|---------------|-------|--------|---------------|-------|-----|--------|------------|
| lai_oct_____  | log   | factor | 2.025805      | 0.001 | 50  | params | 1.0 0.0 1  |
| lai_nov_____  | log   | factor | 0.6485091     | 0.001 | 50  | params | 1.0 0.0 1  |
| lai_dec_____  | log   | factor | 1.156557      | 0.001 | 50  | params | 1.0 0.0 1  |
| height_top__  | log   | factor | 1.036569      | 0.01  | 50  | params | 1.0 0.0 1  |
| displar_c___  | log   | factor | 0.6168842     | 0.01  | 5   | params | 1.0 0.0 1  |
| dleaf_c_____  | log   | factor | 3.3461677E-02 | 0.001 | 0.5 | params | 1.0 0.0 1  |
| z0mr_c_____   | log   | factor | 7.8161609E-02 | 0.01  | 1   | params | 1.0 0.0 1  |
| medlyn_c_____ | log   | factor | 4.711604      | 0.1   | 50  | params | 1.0 0.0 1  |
| rootprof_c__  | log   | factor | 0.5641189     | 0.001 | 1   | params | 1.0 0.0 1  |
| rhoavis_c___  | log   | factor | 3.0766245E-02 | 0.01  | 1   | params | 1.0 0.0 1  |
| rhoavnir_c__  | log   | factor | 0.3934365     | 0.01  | 1   | params | 1.0 0.0 1  |
| rhoavis_c___  | log   | factor | 0.3063361     | 0.01  | 1   | params | 1.0 0.0 1  |
| rhoavnir_c__  | log   | factor | 0.3618872     | 0.01  | 1   | params | 1.0 0.0 1  |
| taulvis_c___  | log   | factor | 2.3902092E-02 | 0.01  | 1   | params | 1.0 0.0 1  |
| taulnir_c___  | log   | factor | 0.3858137     | 0.01  | 1   | params | 1.0 0.0 1  |
| tausvis_c___  | log   | factor | 9.3574092E-02 | 0.01  | 1   | params | 1.0 0.0 1  |
| tausnir_c___  | log   | factor | 0.3056314     | 0.01  | 1   | params | 1.0 0.0 1  |
| sai_jan_____  | fixed | factor | 0.1239475     | 0.001 | 50  | params | 1.0 0.0 1  |
| sai_feb_____  | fixed | factor | 0.2340765     | 0.001 | 50  | params | 1.0 0.0 1  |
| sai_mar_____  | fixed | factor | 9.6431583E-02 | 0.001 | 50  | params | 1.0 0.0 1  |
| sai_apr_____  | fixed | factor | 2.0598052E-02 | 0.001 | 50  | params | 1.0 0.0 1  |
| sai_may_____  | fixed | factor | 2.0598052E-02 | 0.001 | 50  | params | 1.0 0.0 1  |
| sai_jun_____  | fixed | factor | 2.0598052E-02 | 0.001 | 50  | params | 1.0 0.0 1  |
| sai_jul_____  | fixed | factor | 0.6683016     | 0.001 | 50  | params | 1.0 0.0 1  |
| sai_aug_____  | fixed | factor | 0.6886196     | 0.001 | 50  | params | 1.0 0.0 1  |
| sai_sep_____  | fixed | factor | 0.2762972     | 0.001 | 50  | params | 1.0 0.0 1  |
| sai_oct_____  | fixed | factor | 0.1512883     | 0.001 | 50  | params | 1.0 0.0 1  |
| sai_nov_____  | fixed | factor | 0.1001850     | 0.001 | 50  | params | 1.0 0.0 1  |
| sai_dec_____  | fixed | factor | 0.2685816     | 0.001 | 50  | params | 1.0 0.0 1  |
| x1_c_____     | fixed | factor | 0.5000000     | 0.2   | 0.6 | params | -1.0 0.0 1 |
| fmax          | fixed | factor | 0.000000      | 0     | 1   | params | 1.0 0.0 1  |
| organic1_____ | fixed | factor | 6.000000      | 0.1   | 300 | params | 1.0 0.0 1  |

|            |       |        |          |     |     |        |           |
|------------|-------|--------|----------|-----|-----|--------|-----------|
| organic2   | fixed | factor | 0.000000 | 0   | 300 | params | 1.0 0.0 1 |
| soil_color | fixed | factor | 13.00000 | 0.1 | 20  | params | 1.0 0.0 1 |

\* observation groups

obsgrp\_LE

obsgrp\_R

obsgrp\_SWC

obsgrp\_H

obsgrp\_Sout

obsgrp\_Rn

regul\_sand1

regul\_sand2

regul\_clay1

regul\_clay2

regul\_laijan

regul\_laifeb

regul\_laimar

regul\_laiapr

regul\_laimay

regul\_laijun

regul\_laijul

regul\_laiaug

regul\_laisep

regul\_laioct

regul\_lainov

regul\_laidec

regul\_height

regul\_disp

regul\_dleaf

regul\_z0mr

regul\_medlyn

regul\_root

regul\_rholv  
regul\_rholn  
regul\_rhosv  
regul\_rhosn  
regul\_taulv  
regul\_tauln  
regul\_tausv  
regul\_tausn

\* observation data

|                     |               |              |             |
|---------------------|---------------|--------------|-------------|
| obs_2010010100_le   | -3.840600     | 1.153423E-03 | obsgrp_le   |
| obs_2010010101_le   | -2.117845     | 1.153224E-03 | obsgrp_le   |
| obs_2010010102_le   | -1.900800     | 1.153199E-03 | obsgrp_le   |
| ...                 |               |              |             |
| obs_2010010100_r    | 2.9531787E-02 | 0.440018     | obsgrp_r    |
| obs_2010010101_r    | 3.2216495E-02 | 0.440137     | obsgrp_r    |
| obs_2010010102_r    | 3.2216495E-02 | 0.440137     | obsgrp_r    |
| ...                 |               |              |             |
| obs_2010010100_swc  | 0.000000      | 0.00000      | obsgrp_swc  |
| obs_2010010101_swc  | 0.000000      | 0.00000      | obsgrp_swc  |
| obs_2010010102_swc  | 0.000000      | 0.00000      | obsgrp_swc  |
| obs_2010010103_swc  | 0.000000      | 0.00000      | obsgrp_swc  |
| ...                 |               |              |             |
| obs_2010010100_h    | -5.893350     | 0.00000      | obsgrp_h    |
| obs_2010010101_h    | -7.371400     | 0.00000      | obsgrp_h    |
| obs_2010010102_h    | -8.844200     | 0.00000      | obsgrp_h    |
| ...                 |               |              |             |
| obs_2010010100_sout | 1.620300      | 2.557215E-03 | obsgrp_sout |
| obs_2010010101_sout | 1.364500      | 2.557150E-03 | obsgrp_sout |
| obs_2010010102_sout | 1.417800      | 2.557163E-03 | obsgrp_sout |
| ...                 |               |              |             |
| obs_2010010100_rn   | -60.24000     | 1.831959E-03 | obsgrp_rn   |

obs\_2010010101\_rn -57.82300 1.831513E-03 obsgrp\_rn  
obs\_2010010102\_rn -34.69850 1.827263E-03 obsgrp\_rn

...

\* model command line

./model.sh

\* model input/output

surfdata.tpl surfdata.cdl

params.tpl params.cdl

Voulund\_I2000CIm50SpRsGs.clm2.h1.2006\_LE\_H\_Sout.ins

Voulund\_I2000CIm50SpRsGs.clm2.h1.2006.cdl

Voulund\_I2000CIm50SpRsGs.clm2.h2.2006\_LE\_H\_Sout.ins

Voulund\_I2000CIm50SpRsGs.clm2.h2.2006.cdl

qout\_soillayer\_layer11.ins qout\_soillayer\_layer11.csv

qout\_soillayer\_layer11\_monthly.ins qout\_soillayer\_layer11\_monthly.csv

h2osoi\_layer1\_4.ins h2osoi\_layer1\_4.csv

Rn\_model.ins Rn\_model.csv

Rn\_model\_monthly.ins Rn\_model\_monthly.csv

\* prior information

sand1\_\_\_\_\_ 1.0 \* log(sand1\_\_\_\_\_ ) = 1.954242509 1.0 regul\_sand1  
sand2\_\_\_\_\_ 1.0 \* log(sand2\_\_\_\_\_ ) = 1.954242509 1.0 regul\_sand2  
clay1\_\_\_\_\_ 1.0 \* log(clay1\_\_\_\_\_ ) = 0.602059991 1.0 regul\_clay1  
clay2\_\_\_\_\_ 1.0 \* log(clay2\_\_\_\_\_ ) = 0.602059991 1.0 regul\_clay2  
lai\_jan\_\_\_\_\_ 1.0 \* log(lai\_jan\_\_\_\_\_ ) = -0.301029996 1.0 regul\_laijan  
lai\_feb\_\_\_\_\_ 1.0 \* log(lai\_feb\_\_\_\_\_ ) = -0.301029996 1.0 regul\_laifeb  
lai\_mar\_\_\_\_\_ 1.0 \* log(lai\_mar\_\_\_\_\_ ) = 0 1.0 regul\_laimar  
lai\_apr\_\_\_\_\_ 1.0 \* log(lai\_apr\_\_\_\_\_ ) = 0.447158031 1.0 regul\_laiapr  
lai\_may\_\_\_\_\_ 1.0 \* log(lai\_may\_\_\_\_\_ ) = 0.544068044 1.0 regul\_laimay  
lai\_jun\_\_\_\_\_ 1.0 \* log(lai\_jun\_\_\_\_\_ ) = 0.653212514 1.0 regul\_laijun  
lai\_jul\_\_\_\_\_ 1.0 \* log(lai\_jul\_\_\_\_\_ ) = 0.602059991 1.0 regul\_laijul  
lai\_aug\_\_\_\_\_ 1.0 \* log(lai\_aug\_\_\_\_\_ ) = -0.301029996 1.0 regul\_laiaug  
lai\_sep\_\_\_\_\_ 1.0 \* log(lai\_sep\_\_\_\_\_ ) = 0 1.0 regul\_laisep  
lai\_oct\_\_\_\_\_ 1.0 \* log(lai\_oct\_\_\_\_\_ ) = 0 1.0 regul\_laioct  
lai\_nov\_\_\_\_\_ 1.0 \* log(lai\_nov\_\_\_\_\_ ) = 0 1.0 regul\_lainov



|              |                                                   |     |              |
|--------------|---------------------------------------------------|-----|--------------|
| lai_dec_____ | $1.0 * \log(\text{lai\_dec\_}) = 0$               | 1.0 | regul_laidec |
| height_top__ | $1.0 * \log(\text{height\_top\_}) = -0.301029996$ | 1.0 | regul_height |
| displar_c___ | $1.0 * \log(\text{displar\_c\_}) = -0.167491087$  | 1.0 | regul_disp   |
| dleaf_c_____ | $1.0 * \log(\text{dleaf\_c\_}) = -1.397940009$    | 1.0 | regul_dleaf  |
| z0mr_c_____  | $1.0 * \log(\text{z0mr\_c\_}) = -0.920818754$     | 1.0 | regul_z0mr   |
| medlyn_c___  | $1.0 * \log(\text{medlyn\_c\_}) = 0.762678561$    | 1.0 | regul_medlyn |
| rootprof_c__ | $1.0 * \log(\text{rootprof\_c\_}) = -0.025488307$ | 1.0 | regul_root   |
| rho1vis_c___ | $1.0 * \log(\text{rho1vis\_c\_}) = -0.958607315$  | 1.0 | regul_rho1v  |
| rho1nir_c___ | $1.0 * \log(\text{rho1nir\_c\_}) = -0.455931956$  | 1.0 | regul_rho1n  |
| rho5vis_c___ | $1.0 * \log(\text{rho5vis\_c\_}) = -0.508638306$  | 1.0 | regul_rho5v  |
| rho5nir_c___ | $1.0 * \log(\text{rho5nir\_c\_}) = -0.27572413$   | 1.0 | regul_rho5n  |
| taulvis_c___ | $1.0 * \log(\text{taulvis\_c\_}) = -1.301029996$  | 1.0 | regul_taulv  |
| taulnir_c___ | $1.0 * \log(\text{taulnir\_c\_}) = -0.468521083$  | 1.0 | regul_tauln  |
| tausvis_c___ | $1.0 * \log(\text{tausvis\_c\_}) = -0.920818754$  | 1.0 | regul_tausv  |
| tausnir_c___ | $1.0 * \log(\text{tausnir\_c\_}) = -0.602059991$  | 1.0 | regul_tausn  |

\* regularisation

0 0

1.0 1.0e-10 1.0e10

1.3 1.0e-2
